# Supplementary material for: A cloud-compatible bioinformatics pipeline for ultrarapid pathogen identification from next-generation sequencing of clinical samples
Source: HighWire-hosted journal article supplement (doi:10.1101/gr.171934.113), 2014-06-04
Supplement: Supplemental.zip [file weblink-surpi_test_run.docx]

LINK TO OUTPUT FROM SURPI TEST RUN

We¹ve also put the output from the test run (a 616 MB file,

"OUTPUT_SRR1106548.tar.gz²) downloadable at the following link:

<http://chiulab.ucsf.edu/~chiulab/SURPI>

username: guest, password: SURPIdata
